# Supplementary material
Source: Springer Nature journal article supplement (https://www.springermedizin.de/resource/supplementary/13054_2012_890_MOESM3_ESM.PDF/9709278)

**Additional File 3. Dose-dependent effects of metformin on human platelet respiratory chain complex activities.** Platelets from healthy donors were incubated in plasma with saline (white bar) or metformin diluted in saline (concentration: 1.66 mg/l, grey bar; 166 mg/l, dark grey bar or 16600 mg/l, black bar). After 72 h, the activity of **(a)** complex I (CI) ( $p=0.009$ ; one-way ANOVA), **(b)** complex II and III (CII+III) ( $p=0.767$ ; one-way ANOVA) and **(c)** complex IV (CIV) ( $p=0.864$ ; one-way ANOVA) were measured and expressed relative to that of **(d)** citrate synthase (CS) ( $p=0.840$ ; one-way ANOVA). Data are mean and SD from 4 experiments. \* $p<0.05$  vs. saline (Holm-Sidak method).

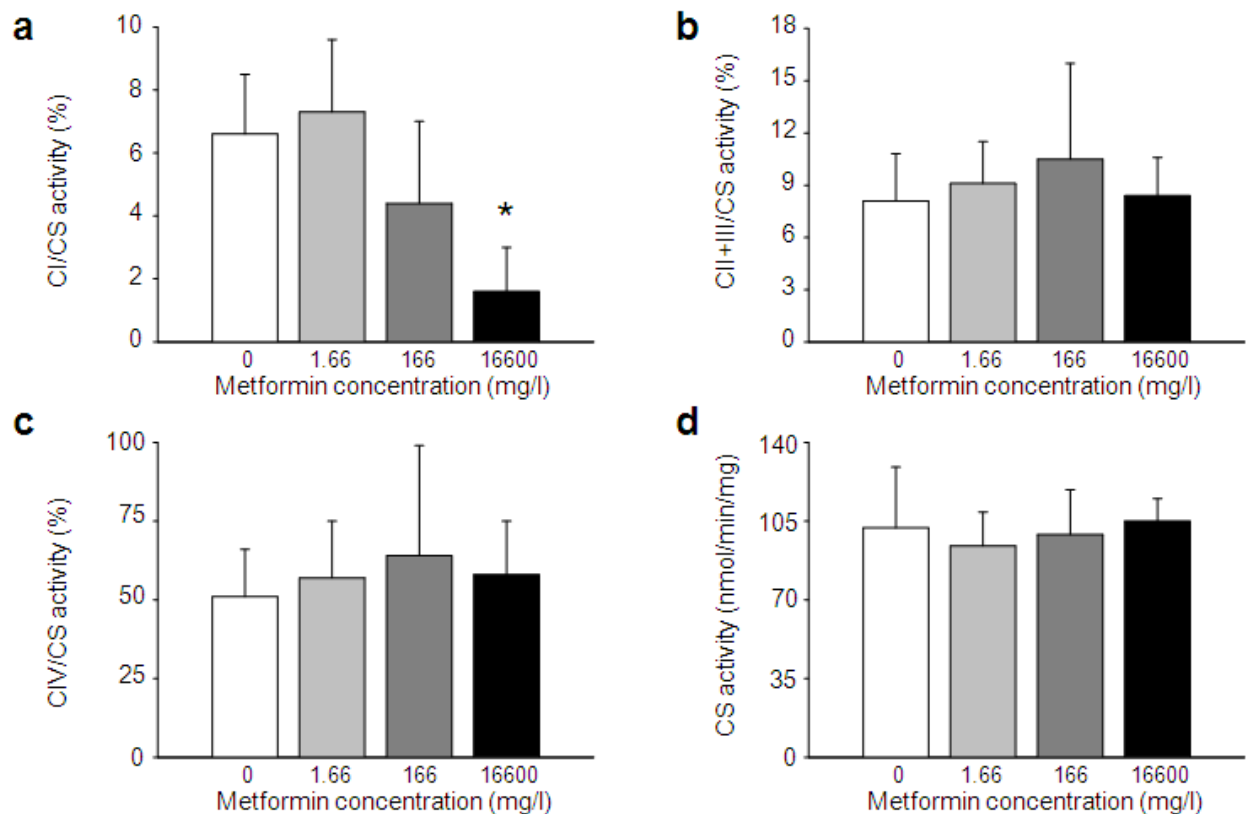

Supplement: MOESM3 [file 9709278]
